# Supplementary material
Source: MDPI journal article supplement (https://www.mdpi.com/2304-6767/11/9/211)
Supplement: s1 [file s1]

## Supplementary Materials

**Figure S1.** Graphical plots of direct and indirect comparisons for: A) Compressive Strength and B) Microleakage.

### A) Compressive Strength

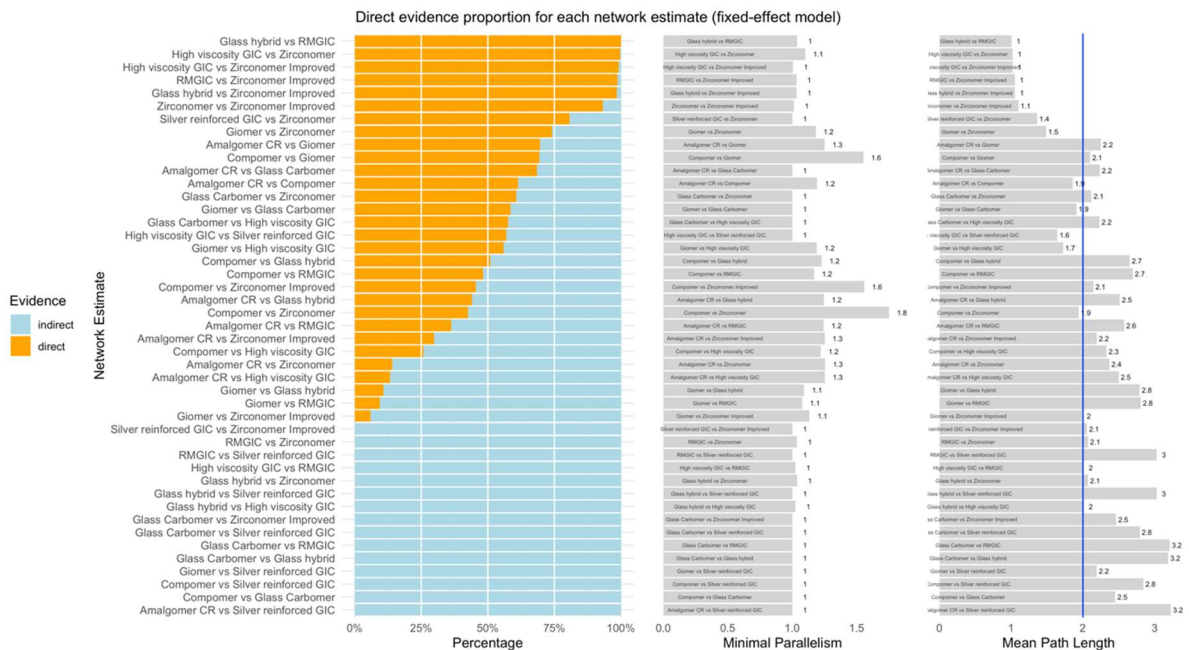

GIC: Glass Ionomer Cement; RMGIC: Resin Modified Glass Ionomer Cement;  
Amalgomer CR: Ceramic Reinforced Glass Ionomer Cement.

### B) Microleakage

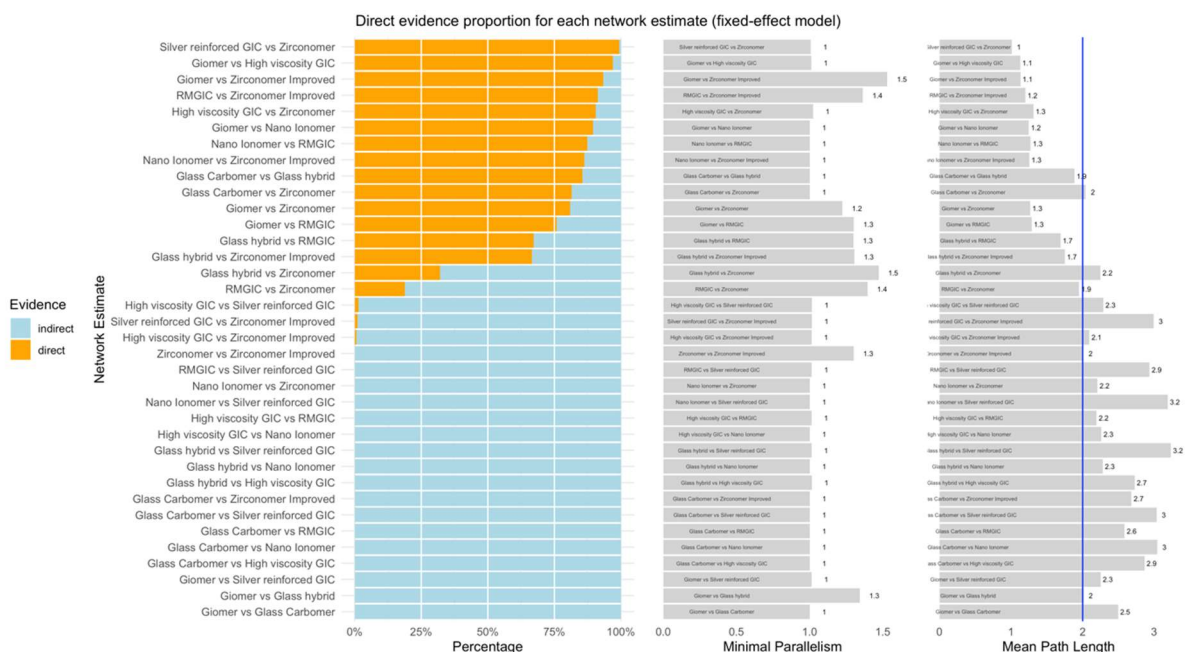

\*GIC: Glass Ionomer Cement; RMGIC: Resin Modified Glass Ionomer Cement;  
Amalgomer CR: Ceramic Reinforced Glass Ionomer Cement.

**Figure S2.** Comparisons of both direct and indirect measures: A) Compressive Strength and B) Microleakage.

### A) Compressive Strength

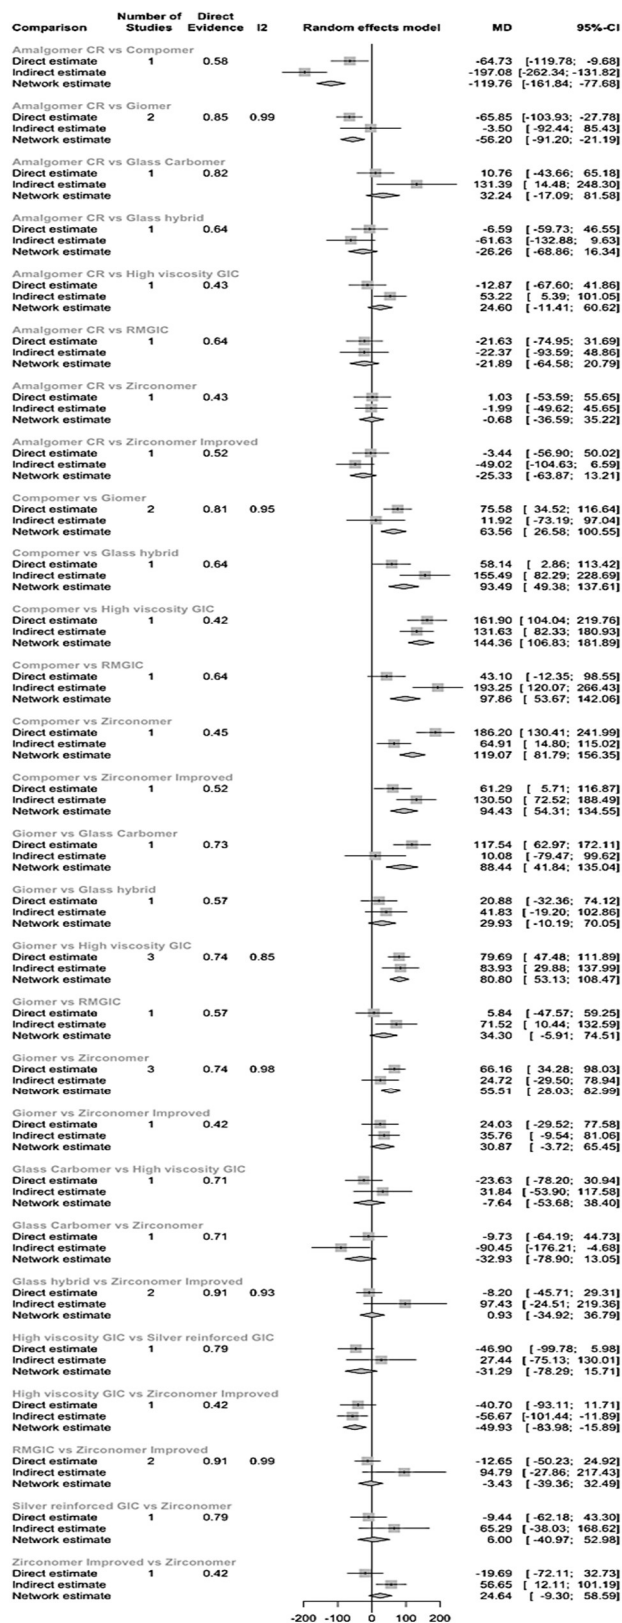

\* GIC: Glass Ionomer Cement; RMGIC: Resin Modified Glass Ionomer Cement;  
Amalgomer CR: Ceramic Reinforced Glass Ionomer Cement.

## B) Microleakage

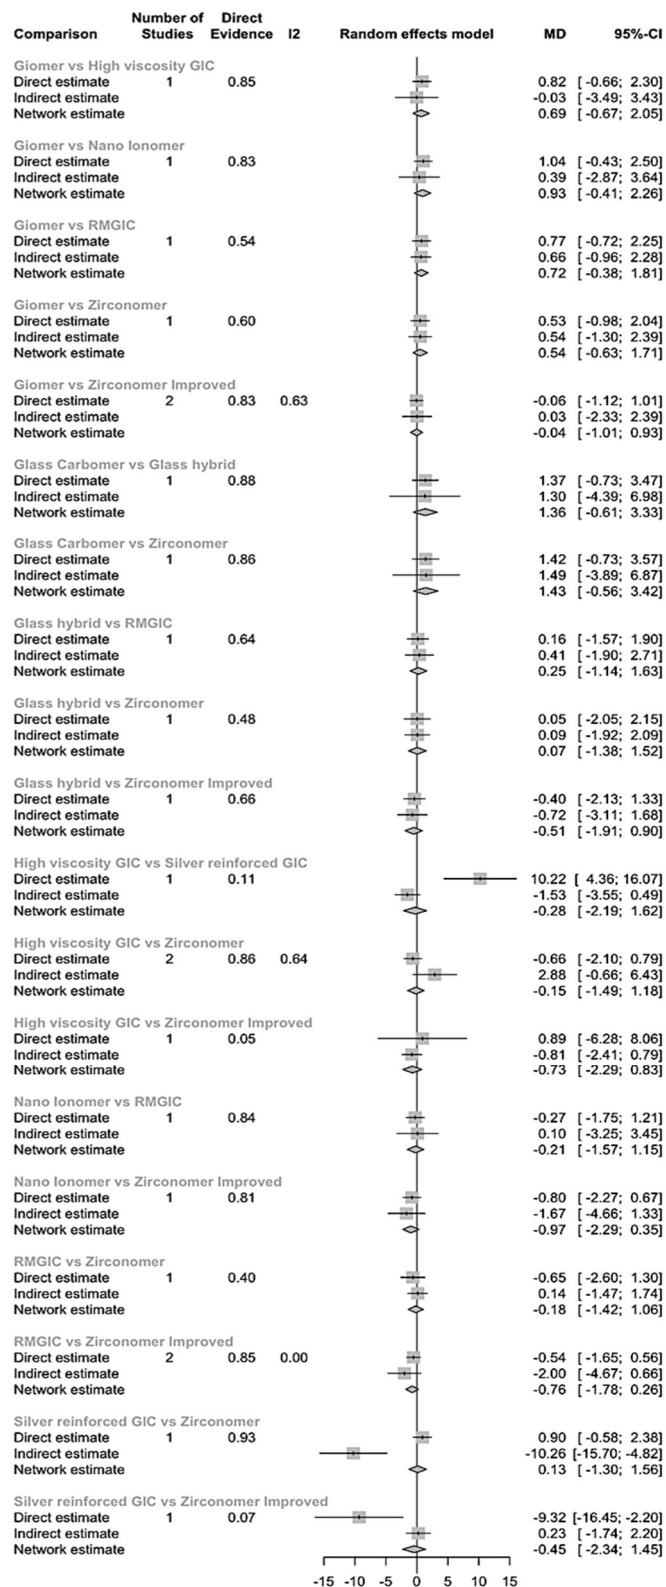

\*GIC: Glass Ionomer Cement; RMGIC: Resin Modified Glass Ionomer Cement;  
Amalgomer CR: Ceramic Reinforced Glass Ionomer Cement.

**Figure S3.** Heat map illustrating: A) Compressive Strength and B) Microleakage.

### A) Compressive Strength

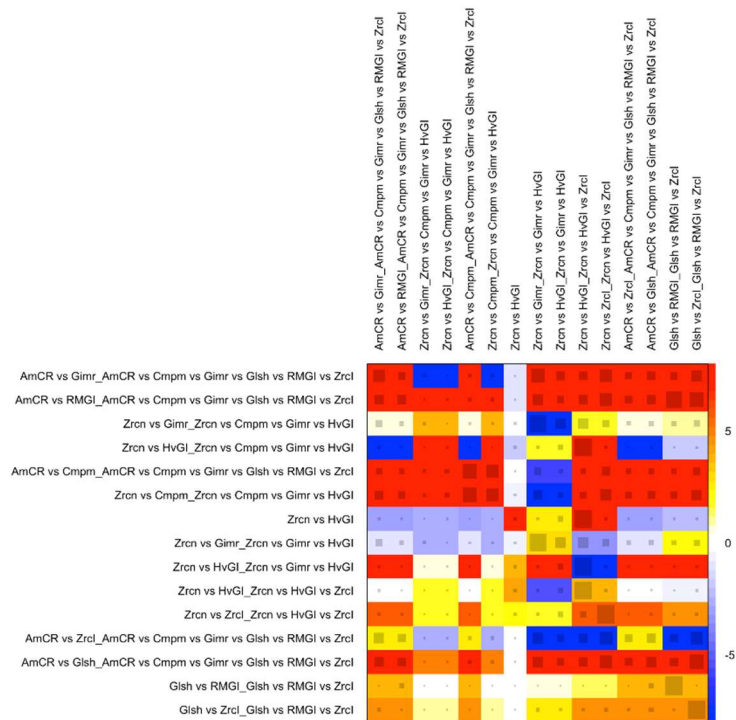

### B) Microleakage

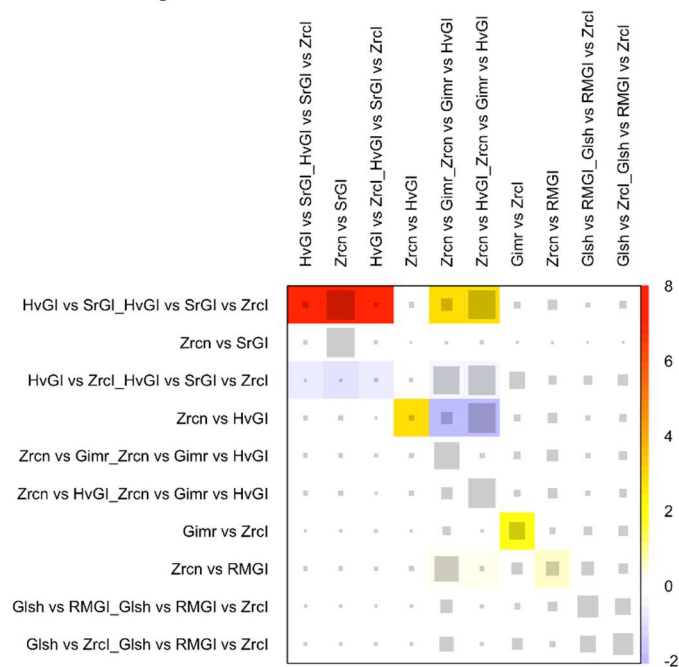

**Table S1.** Search approach.

| PubMed-MEDLINE                                                                                                                                                                                                                                                                                                                                                                                                                                                                                                                                                                                                                                                                                                                                                                                                                                                                                                                                                                                                                                                                                                                                                                                                             |
|----------------------------------------------------------------------------------------------------------------------------------------------------------------------------------------------------------------------------------------------------------------------------------------------------------------------------------------------------------------------------------------------------------------------------------------------------------------------------------------------------------------------------------------------------------------------------------------------------------------------------------------------------------------------------------------------------------------------------------------------------------------------------------------------------------------------------------------------------------------------------------------------------------------------------------------------------------------------------------------------------------------------------------------------------------------------------------------------------------------------------------------------------------------------------------------------------------------------------|
| (('cement specimen' OR 'tooth'/exp OR 'dental evolution' OR 'dentes' OR 'teeth' OR 'tooth' OR 'tooth auxiliary' OR 'tooth components' OR 'tooth condition' OR 'tooth emergency' OR teeth OR tooth) AND ('zirconomer'/exp OR zirconia OR 'zirconium'/exp OR 'novel glass ionomer cement' OR 'zirconia reinforced glass ionomer cement') AND ('tooth cement'/exp OR 'calcium hydroxide cement' OR 'calcium hydroxide dental cement' OR 'calcium hydroxide tooth cement' OR 'cement, dental' OR 'dental cement' OR 'dental cements' OR 'ethoxy benzoic acid dental cement' OR 'fatty acid dental cement' OR 'tooth cement' OR 'cement'/exp OR 'adhesor cement' OR 'canal cement' OR 'cement' OR 'cement granule' OR 'cementing substance' OR 'cermet cements' OR 'coe tray cement' OR 'portland 500' OR 'miracle mix'/exp OR 'modified glass ionomer cements' OR 'fuji ix'/exp OR 'high viscosity glass ionomer cement' OR 'giomer'/exp OR compomers OR 'reinforced glass ionomer cement' OR 'nano ionomer' OR 'glass ionomer cements') AND (' <i>in vitro</i> study'/exp OR ' <i>in vitro</i> ' OR ' <i>in vitro</i> studies' OR ' <i>in vitro</i> study' OR ' <i>in vitro</i> technique' OR ' <i>in vitro</i> techniques')) |
| Embase                                                                                                                                                                                                                                                                                                                                                                                                                                                                                                                                                                                                                                                                                                                                                                                                                                                                                                                                                                                                                                                                                                                                                                                                                     |
| (('cement specimen' OR 'tooth'/exp OR 'dental evolution' OR 'dentes' OR 'teeth' OR 'tooth' OR 'tooth auxiliary' OR 'tooth components' OR 'tooth condition' OR 'tooth emergency' OR teeth OR tooth) AND ('zirconomer'/exp OR zirconia OR 'zirconium'/exp OR 'novel glass ionomer cement' OR 'zirconia reinforced glass ionomer cement') AND ('tooth cement'/exp OR 'calcium hydroxide cement' OR 'calcium hydroxide dental cement' OR 'calcium hydroxide tooth cement' OR 'cement, dental' OR 'dental cement' OR 'dental cements' OR 'ethoxy benzoic acid dental cement' OR 'fatty acid dental cement' OR 'tooth cement' OR 'cement'/exp OR 'adhesor cement' OR 'canal cement' OR 'cement' OR 'cement granule' OR 'cementing substance' OR 'cermet cements' OR 'coe tray cement' OR 'portland 500' OR 'miracle mix'/exp OR 'modified glass ionomer cements' OR 'fuji ix'/exp OR 'high viscosity glass ionomer cement' OR 'giomer'/exp OR compomers OR 'reinforced glass ionomer cement' OR 'nano ionomer' OR 'glass ionomer cements') AND (' <i>in vitro</i> study'/exp OR ' <i>in vitro</i> ' OR ' <i>in vitro</i> studies' OR ' <i>in vitro</i> study' OR ' <i>in vitro</i> technique' OR ' <i>in vitro</i> techniques')) |

**Table S2.** Generic name, brand name, and composition of the cement.

| Srl no. | Cement<br>(Generic name referenced in this review) | Brand<br>(As mentioned in the original article) | Composition                                                                                                                                                 |
|---------|----------------------------------------------------|-------------------------------------------------|-------------------------------------------------------------------------------------------------------------------------------------------------------------|
| 1       | Zirconia reinforced glass ionomer cement           | Zirconomer (Shofu, Japan)                       | Powder: zirconium oxide, glass powder, tartaric acid (1 - 10%), polyacrylic acid (20 - 50%).<br>Liquid: deionized water.                                    |
| 2       | Zirconia reinforced glass ionomer cement           | Zirconomer improved (Shofu, Japan)              | Powder: zirconium oxide (zirconia nano fillers), glass powder, tartaric acid (1 - 10%), polyacrylic acid (20 - 50%).<br>Liquid: deionized water.            |
|         |                                                    | Ketac molar (3M ESPE, USA)                      | Powder: calcium aluminium lanthanum fluorosilicate glass, copolymer, pigments.<br>Liquid: acrylic acid, maleic acid copolymer, tartaric acid, benzoic acid. |
| 3       | High viscosity GIC                                 | Type IX, Type IX extra (GC, Tokyo, Japan)       | Powder: aluminosilicate glass, polyacrylic acid.<br>Liquid: polyacrylic acid, polybasic acid.                                                               |
| 4       | Giomer                                             | Beautifil II (Shofu, Kyoto, Japan)              | Bis-GMA, TEGDMA, aluminium oxide, silica, aluminofluoro-borosilicate glass filler, pre-reacted glass ionomer filler, camphoroquinone.                       |
|         |                                                    | Miracle mix (GC, Tokyo, Japan)                  | powder: aluminosilicate glass, silver alloy powder.<br>Liquid: polyacrylic acid, water, polybasic carboxylic acid.                                          |
| 5       | Silver reinforced GIC                              | Xtracem-S (Medicept Dental)                     | Powder: fluoro alumina silicate glass, nano silver filler.<br>Liquid: polyacrylic acid, tartaric acid.                                                      |
| 6       | RMGIC                                              | Fuji II LC (GC, Tokyo, Japan)                   | Powder: aluminosilicate glass, pigments.<br>Liquid: polyacrylic acids, distilled water, HEMA(17%), dimethacrylate monomer, camphoroquinone.                 |

Dyract-XP (Dentsply sirona,  
Germany)

Sr-Al-N-  
Fluoroaluminosilicate glass,  
strontium fluoride, UDMA,  
TEGDMA, TMPTMA, TCB  
RESIN, dimethacrylate resins,  
dimethylaminobenzoic acid  
ethyl ester, camphorquinone,  
BHT, UV stabilizer, iron oxide  
and titanium oxide pigments.

|    |                |                                                |                                                                                                                                                                              |
|----|----------------|------------------------------------------------|------------------------------------------------------------------------------------------------------------------------------------------------------------------------------|
| 7  | Compomer       | Compoglass F<br>(Ivoclar vivadent, NY)         | Barium fluorosilicate glass,<br>UDMA, TEGDMA,<br>CADCADM, ytterbium<br>trifluoride.                                                                                          |
| 8  | Glass Hybrid   | Equia forte (GC, Tokyo, Japan)                 | Powder: strontium-fluoro-<br>alumino-silicate glass,<br>polyacrylic acid.<br>Liquid: aqueous polyacrylic<br>acid.                                                            |
| 9  | Glass carbomer | Glassfill (GCP, Netherland)                    | Powder: Nanofluoro,<br>hydroxyapatite.<br>Liquid: polyacids, silica.                                                                                                         |
| 10 | Amalgomer CR   | Amalgomer CR (Advanced<br>Healthcare Ltd., UK) | Powder: fluoro-alumino-<br>silicate glass, polyacrylic acid<br>powder, tartaric acid powder,<br>ceramic reinforcing powder.<br>Liquid: polyacrylic acid,<br>distilled water. |
| 11 | Nano-Ionomer   | Ketac N 100 (3M ESPE, St. Paul,<br>MN, USA)    | Deionized water, HEMA,<br>VBCP, fluoroaluminosilicate<br>glass, nanomers, nanoclusters.                                                                                      |

**GIC:** Glass ionomer cement; **RMGIC:** Resin Modified Glass Ionomer Cement; **UDMA:** Urethane dimethacrylate; **HEMA:** Hydroxyethyl methacrylate; **TEGDMA:** Triethylene glycol dimethacrylate; **Bis-GMA:** Bis-phenol A glycidyl methacrylate; **CADCADM:** Cycloaliphatic dicarboxylic acid dimethacrylate; **VBCP:** Vitrebond Copolymer.

**Table S3.** Incorporation of individual study data (intervention and comparison means) for Compressive Strength and Microleakage in the Network Meta-Analysis.

| Sr. No.                     | Author         | Year      | Intervention        | Comparative           | Mean_Intervention | Mean_Comparison |
|-----------------------------|----------------|-----------|---------------------|-----------------------|-------------------|-----------------|
| <b>Compressive Strength</b> |                |           |                     |                       |                   |                 |
| 1                           | Walia R [21]   | 2016      | Zirconomer          | High viscosity GIC    | 220.48            | 153.74          |
| 1                           | Walia R [21]   | 2016      | Zirconomer          | Giomer                | 220.48            | 250.95          |
| 2                           | Bhatia H [22]  | 2017      | Zirconomer          | High viscosity GIC    | 160.91            | 104.57          |
| 2                           | Bhatia H [22]  | 2017      | Zirconomer          | Silver reinforced GIC | 160.91            | 151.47          |
| 3                           | Canturk K [23] | 2020      | Zirconomer Improved | RMGIC                 | 66.7              | 84.89           |
| 3                           | Canturk K [23] | 2020      | Zirconomer Improved | Compomer              | 66.7              | 127.99          |
| 3                           | Canturk K [23] | 2020      | Zirconomer Improved | Glass Hybrid          | 66.7              | 69.85           |
| 3                           | Canturk K [23] | 2020      | Zirconomer Improved | Giomer                | 66.7              | 90.73           |
| 3                           | Canturk K [23] | 2020      | Zirconomer Improved | Amalgomer CR          | 66.7              | 63.26           |
| 4                           | Shetty C [24]  | 2017      | Zirconomer          | High viscosity GIC    | 321.92            | 261.53          |
| 4                           | Shetty C [24]  | 2017      | Zirconomer Improved | High viscosity GIC    | 302.23            | 261.53          |
| 5                           | Patel A [25]   | 2018      | Zirconomer          | High viscosity GIC    | 18.05             | 18.295          |
| 6                           | Patil K [26]   | 2016      | Zirconomer          | Giomer                | 12.6              | 75.5            |
| 6                           | Patil K [26]   | 2016      | Zirconomer          | High viscosity GIC    | 12.6              | 36.9            |
| 6                           | Patil K [26]   | 2016      | Zirconomer          | Compomer              | 12.6              | 198.8           |
| 7                           | S Dhivya [27]  | 2017-2020 | Zirconomer Improved | Glass Hybrid          | 153.777           | 134.756         |
| 7                           | S Dhivya [27]  | 2017-2020 | Zirconomer Improved | RMGIC                 | 153.777           | 111.892         |
| 8                           | Uğurlu M [28]  | 2020      | Zirconomer          | Glass Carbomer        | 140.55            | 130.82          |
| 8                           | Uğurlu M [28]  | 2021      | Zirconomer          | Amalgomer CR          | 140.55            | 141.58          |



|   |                  |      |            |                       |        |        |
|---|------------------|------|------------|-----------------------|--------|--------|
| 8 | Uğurlu M<br>[28] | 2022 | Zirconomer | High<br>viscosity GIC | 140.55 | 154.45 |
| 8 | Uğurlu M<br>[28] | 2023 | Zirconomer | Giomer                | 140.55 | 248.36 |

#### Microleakage

|   |                              |               |                        |                             |       |        |
|---|------------------------------|---------------|------------------------|-----------------------------|-------|--------|
| 1 | Asafarlal S<br>[29]          | 2017          | Zirconomer             | High<br>viscosity GIC       | 9.88  | 5.7622 |
| 2 | Ranadheer<br>E<br>[30]       | 2018          | Zirconomer             | Silver<br>reinforced<br>GIC | 1.40  | 2.30   |
| 3 | Mohammed<br>Salman K<br>[31] | 2019          | Zirconomer<br>Improved | Giomer                      | 2.30  | 2.53   |
| 3 | Mohammed<br>Salman K<br>[31] | 2019          | Zirconomer<br>Improved | RMGIC                       | 2.30  | 1.77   |
| 3 | Mohammed<br>Salman K<br>[31] | 2019          | Zirconomer<br>Improved | Nano<br>Ionomer             | 2.30  | 1.50   |
| 4 | Mahmoud<br>N<br>[32]         | 2020          | Zirconomer<br>Improved | Glass Hybrid                | 2.21  | 1.81   |
| 4 | Mahmoud<br>N<br>[32]         | 2020          | Zirconomer<br>Improved | RMGIC                       | 2.21  | 1.65   |
| 5 | Sharafeddin<br>F<br>[33]     | 2019          | Zirconomer             | RMGIC                       | 1.85  | 1.20   |
| 6 | Meral E<br>[34]              | 2019          | Zirconomer             | Glass Hybrid                | 1.58  | 1.63   |
| 6 | Meral E<br>[34]              | 2019          | Zirconomer             | Glass<br>Carbomer           | 1.58  | 3.00   |
| 7 | Ashok L<br>[35]              | 2017-<br>2020 | Zirconomer<br>Improved | Giomer                      | 1.44  | 1.07   |
| 8 | Kaladevi M<br>[36]           | 2017-<br>2020 | Zirconomer<br>Improved | High<br>viscosity GIC       | 15.80 | 16.69  |
| 8 | Kaladevi M<br>[36]           | 2017-<br>2020 | Zirconomer<br>Improved | Silver<br>reinforced<br>GIC | 15.80 | 6.48   |
| 9 | Walia R<br>[21]              | 2016          | Zirconomer             | High<br>viscosity GIC       | 1.67  | 1.38   |
| 9 | Walia R<br>[21]              | 2016          | Zirconomer             | Giomer                      | 1.67  | 2.20   |

\*GIC: Glass Ionomer Cement; RMGIC: Resin Modified Glass Ionomer Cement;  
Amalgomer CR: Ceramic Reinforced Glass Ionomer Cement.

**Table S4.** Ranking of materials based on: A) Compressive Strength and B) Microleakage.

**A) Compressive strength**

| <b>Cement</b>         | <b>P Score</b> |
|-----------------------|----------------|
| Compomer              | 0.9999         |
| Giomer                | 0.8676         |
| Glass hybrid          | 0.6290         |
| Zirconomer improved   | 0.6271         |
| RMGIC                 | 0.5787         |
| Silver reinforced GIC | 0.4269         |
| Zirconomer            | 0.3528         |
| Amalgomer cr          | 0.3416         |
| High viscosity GIC    | 0.0945         |
| Glass carbomer        | 0.0819         |

\*GIC: Glass Ionomer Cement; RMGIC: Resin Modified Glass Ionomer Cement;  
Amalgomer CR: Ceramic Reinforced Glass Ionomer Cement.

**B) Microleakage**

| <b>Cement</b>         | <b>P score</b> |
|-----------------------|----------------|
| Nano ionomer          | 0.7562         |
| RMGIC                 | 0.6913         |
| High viscosity GIC    | 0.6566         |
| Zirconomer            | 0.5961         |
| Glass hybrid          | 0.5579         |
| Silver reinforced GIC | 0.5218         |
| Giomer                | 0.3073         |
| Zirconomer improved   | 0.2907         |
| Glass carbomer        | 0.1221         |

\*GIC: Glass Ionomer Cement; RMGIC: Resin Modified Glass Ionomer Cement;  
Amalgomer CR: Ceramic Reinforced Glass Ionomer Cement.

[NOTE: The P score arranges the materials from highest to lowest based on their effect.]

**Table S5.** Evaluation of Bias Risk and Individual Study Quality using Joanna Briggs Institute (JBI) Critical Appraisal Tools, with Adjustments following the Checklist for Reporting *In vitro* Studies (CRIS Guidelines).

| STUDY                       | Q1. Was the sample size calculation Adequately Reported? | Q2. Was true randomisation used for assignment of samples to treatment groups? | Q3. Were treatment groups similar at baseline? | Q4. Were Treatment groups treated by the same operator? | Q5. Were those delivering treatment blind to treatment Assignment? | Q6. Were Treatment groups treated identically other than the intervention of interest? | Q7. Were outcomes assessed by the same outcome assessor or were the outcome assessors calibrated and the level of agreement Determined? | Q8. Were Outcome assessors blind to treatment Assignment? | Q9. Were Outcomes measured in the same manner for treatment groups? | Q10. Was appropriate statistical analysis used? | Q11. Were results for all samples reported? If not, were the losses adequately described and analysed? | Q12. Was the study design appropriate and apparently free of other biases? | Yes (n) | Risk of Bias |
|-----------------------------|----------------------------------------------------------|--------------------------------------------------------------------------------|------------------------------------------------|---------------------------------------------------------|--------------------------------------------------------------------|----------------------------------------------------------------------------------------|-----------------------------------------------------------------------------------------------------------------------------------------|-----------------------------------------------------------|---------------------------------------------------------------------|-------------------------------------------------|--------------------------------------------------------------------------------------------------------|----------------------------------------------------------------------------|---------|--------------|
| Walia R 2016 [21]           | no                                                       | unclear                                                                        | yes                                            | unclear                                                 | no                                                                 | yes                                                                                    | Unclear                                                                                                                                 | no                                                        | yes                                                                 | yes                                             | yes                                                                                                    | yes                                                                        | 6       | MODERATE     |
| Bhatia H 2017 [22]          | no                                                       | unclear                                                                        | yes                                            | unclear                                                 | no                                                                 | yes                                                                                    | unclear                                                                                                                                 | no                                                        | yes                                                                 | yes                                             | yes                                                                                                    | yes                                                                        | 6       | MODERATE     |
| Canturk K 2020 [23]         | no                                                       | unclear                                                                        | yes                                            | unclear                                                 | no                                                                 | yes                                                                                    | unclear                                                                                                                                 | no                                                        | yes                                                                 | yes                                             | yes                                                                                                    | yes                                                                        | 6       | MODERATE     |
| Shetty C 2017 [24]          | no                                                       | unclear                                                                        | yes                                            | unclear                                                 | no                                                                 | yes                                                                                    | unclear                                                                                                                                 | no                                                        | yes                                                                 | yes                                             | yes                                                                                                    | no                                                                         | 5       | HIGH         |
| Patel A 2018 [25]           | no                                                       | unclear                                                                        | yes                                            | unclear                                                 | no                                                                 | yes                                                                                    | unclear                                                                                                                                 | no                                                        | yes                                                                 | yes                                             | yes                                                                                                    | yes                                                                        | 6       | MODERATE     |
| Patil K 2016 [26]           | no                                                       | unclear                                                                        | yes                                            | unclear                                                 | no                                                                 | yes                                                                                    | unclear                                                                                                                                 | no                                                        | yes                                                                 | yes                                             | yes                                                                                                    | yes                                                                        | 6       | MODERATE     |
| S Dhivya 2017-2020 [27]     | no                                                       | unclear                                                                        | yes                                            | unclear                                                 | no                                                                 | yes                                                                                    | unclear                                                                                                                                 | no                                                        | yes                                                                 | yes                                             | yes                                                                                                    | yes                                                                        | 6       | MODERATE     |
| Uğurlu M 2020 [28]          | no                                                       | unclear                                                                        | yes                                            | unclear                                                 | no                                                                 | yes                                                                                    | unclear                                                                                                                                 | no                                                        | yes                                                                 | yes                                             | yes                                                                                                    | yes                                                                        | 6       | MODERATE     |
| Asafarlal S 2017 [29]       | no                                                       | unclear                                                                        | yes                                            | yes                                                     | no                                                                 | yes                                                                                    | unclear                                                                                                                                 | yes                                                       | yes                                                                 | yes                                             | yes                                                                                                    | yes                                                                        | 8       | LOW          |
| Ranadheer E 2018 [30]       | no                                                       | unclear                                                                        | yes                                            | yes                                                     | no                                                                 | yes                                                                                    | unclear                                                                                                                                 | no                                                        | yes                                                                 | yes                                             | yes                                                                                                    | yes                                                                        | 7       | MODERATE     |
| Mohammed Salman K 2019 [31] | no                                                       | unclear                                                                        | yes                                            | unclear                                                 | no                                                                 | yes                                                                                    | unclear                                                                                                                                 | no                                                        | yes                                                                 | yes                                             | yes                                                                                                    | no                                                                         | 5       | HIGH         |
| Mahmoud N 2020 [32]         | no                                                       | unclear                                                                        | yes                                            | unclear                                                 | no                                                                 | yes                                                                                    | unclear                                                                                                                                 | yes                                                       | yes                                                                 | yes                                             | yes                                                                                                    | yes                                                                        | 7       | MODERATE     |
| Sharafeddin F 2019 [33]     | no                                                       | unclear                                                                        | yes                                            | unclear                                                 | no                                                                 | yes                                                                                    | unclear                                                                                                                                 | no                                                        | yes                                                                 | yes                                             | yes                                                                                                    | yes                                                                        | 6       | MODERATE     |
| Meral E 2019 [34]           | no                                                       | unclear                                                                        | yes                                            | yes                                                     | no                                                                 | yes                                                                                    | unclear                                                                                                                                 | no                                                        | yes                                                                 | yes                                             | yes                                                                                                    | yes                                                                        | 7       | MODERATE     |
| Ashok L 2017-2020 [35]      | no                                                       | unclear                                                                        | yes                                            | unclear                                                 | no                                                                 | yes                                                                                    | unclear                                                                                                                                 | no                                                        | yes                                                                 | yes                                             | yes                                                                                                    | yes                                                                        | 6       | MODERATE     |
| Kaladevi M 2017-2020 [36]   | no                                                       | unclear                                                                        | yes                                            | unclear                                                 | no                                                                 | yes                                                                                    | unclear                                                                                                                                 | no                                                        | yes                                                                 | yes                                             | yes                                                                                                    | yes                                                                        | 6       | MODERATE     |

\* High risk of bias was assigned when the study achieved up to five 'yes' scores, moderate risk when the study achieved six to eight 'yes' scores, and low risk when the study achieved eight or more 'yes' scores.
